# Supplementary material
Source: PubMed Central journal article supplement (PMC3416510)
Supplement: JB.06769-11_zjb999091689so1.pdf [file JB.06769-11_zjb999091689so1.pdf]

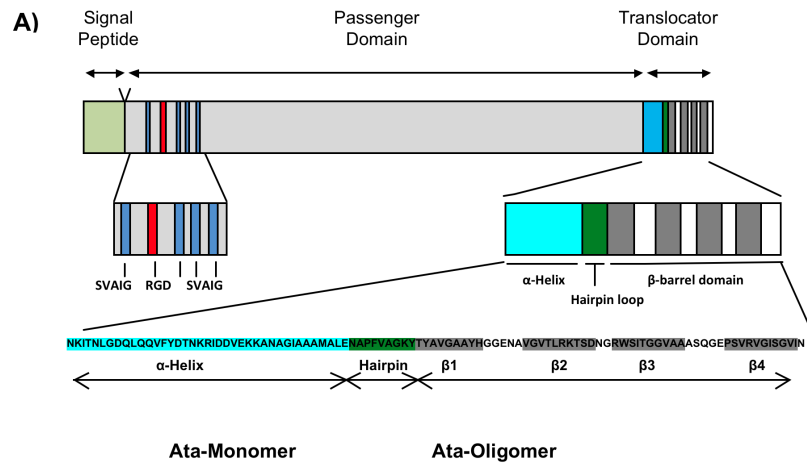

Ata-Monomer

Ata-Oligomer

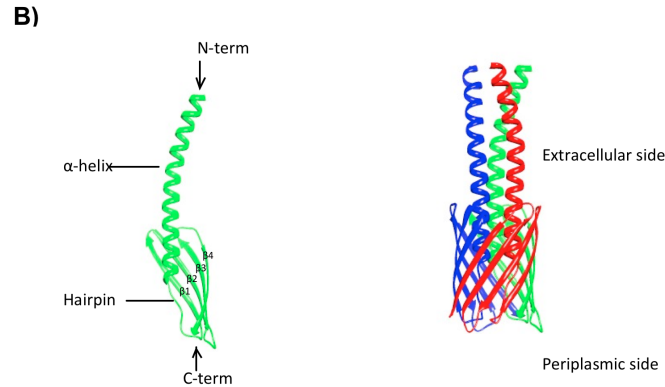

**Fig. S1.** *In silico* analysis of the Ata protein. A) Schematic representation of the domain architecture of the *A. baumannii* ATCC 17978 Ata protein. Indicated are the signal peptide, the N-terminal domain encoding an RGD and four SVAIG collagen binding motifs and the C-terminal translocator domain consisting of a proximal  $\alpha$ -helix and a hairpin loop, which connects the  $\alpha$ -helix to the beta-barrel domain. The beta-barrel domain consists of four transmembrane antiparallel beta-sheets ( $\beta 1$  to  $\beta 4$ ). B) Stereo ribbon diagram of monomeric and trimeric Ata generated by computer modeling of the crystal structure of the C-terminal translocator domain of Ata. Secondary structures and loop regions are labeled in the monomeric Ata structure.

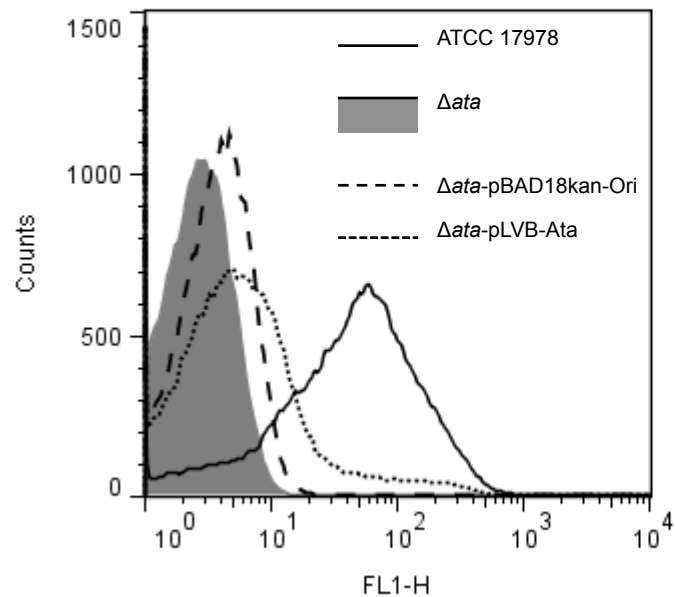

**Fig. S2.** Flow cytometry analysis of wild type *A. baumannii* ATCC 17978,  $\Delta$ *ata*,  $\Delta$ *ata*-pLVB-Ata and  $\Delta$ *ata*-pBAD18Kan-Ori strains grown to OD<sub>650</sub> nm 0.025 and labeled with anti-Ata rabbit sera and a secondary goat antibody to rabbit IgG conjugated to Alexa 488 fluorescent dye. Fluorescence is expressed in relative units, and the data are representative of multiple independent flow analyses.
